# Supplementary material for: Distinct Adaptive Immunophenotypes in duodenal mucosa but not in peripheral blood of patients with functional dyspepsia
Source: bioRxiv or medRxiv preprint supplement (doi:10.1101/2021.11.22.21266508), 2021-11-24

Supplementary Table 1: List of antibodies used in surface marker flow cytometry staining for identification of lymphocyte subsets

| <b>Antibody target</b> | <b>Fluorophore</b> | <b>Clone</b> | <b>Supplier</b>                | <b>Vol./100<math>\mu</math>L test</b> |
|------------------------|--------------------|--------------|--------------------------------|---------------------------------------|
| CD3                    | BUV805             | UCHT1        | BD Biosciences, cat no. 612896 | 2 $\mu$ L                             |
| CD4                    | FITC               | RPA-T4       | BD Biosciences, cat no. 555346 | 5 $\mu$ L                             |
| CD8                    | BUV496             | RPA-T8       | BD Biosciences, cat no. 612942 | 2 $\mu$ L                             |
| CD45RA                 | BUV395             | 5H9          | BD Biosciences, cat no. 740315 | 2 $\mu$ L                             |
| CD45RO                 | PE-CY7             | UCHL1        | BD Biosciences, cat no. 560608 | 2 $\mu$ L                             |
| CCR7 (CD197)           | BV711              | 150503       | BD Biosciences, cat no. 566602 | 5 $\mu$ L                             |
| CCR6 (CD196)           | BV786              | 11A9         | BD Biosciences, cat no. 563704 | 5 $\mu$ L                             |
| CCR4 (CD194)           | BV421              | 1G1          | BD Biosciences, cat no. 562579 | 5 $\mu$ L                             |
| CXCR3 (CD183)          | PE                 | 1C6          | BD Biosciences, cat no. 557185 | 15 $\mu$ L                            |
| Integrin $\alpha$ 4    | PE-CF594           | 9F10         | BD Biosciences, cat no. 563645 | 5 $\mu$ L                             |
| Integrin $\beta$ 7     | BV650              | FIB504       | BD Biosciences, cat no. 564285 | 5 $\mu$ L                             |
| CCR9                   | APC                | 112509       | BD Biosciences, cat no. 557975 | 2 $\mu$ L                             |
| Fixable viability dye  | FVS700             | N/A          | BD Biosciences, cat no. 564997 | 1:1000                                |

Supplementary Table 2: Surface markers for the identification of T cell subsets

| <b>T cell subset</b>              | <b>Surface maker phenotype</b>                                                                                                                                                                                     |
|-----------------------------------|--------------------------------------------------------------------------------------------------------------------------------------------------------------------------------------------------------------------|
| Lymphocytes                       | CD3 <sup>+</sup>                                                                                                                                                                                                   |
| T helper cells                    | CD3 <sup>+</sup> CD4 <sup>+</sup>                                                                                                                                                                                  |
| Cytotoxic T cells                 | CD3 <sup>+</sup> CD8 <sup>+</sup>                                                                                                                                                                                  |
| Naïve T cells                     | CD4 <sup>+</sup> CD45RA <sup>+</sup> CCR7 <sup>+</sup> /CD8 <sup>+</sup> CD45RA <sup>+</sup> CCR7 <sup>+</sup>                                                                                                     |
| Effector T cells                  | CD4 <sup>+</sup> CD45RA <sup>+</sup> CCR7 <sup>-</sup> /CD8 <sup>+</sup> CD45RA <sup>+</sup> CCR7 <sup>-</sup>                                                                                                     |
| Central memory T cells            | CD4 <sup>+</sup> CD45RO <sup>+</sup> CCR7 <sup>+</sup> /CD8 <sup>+</sup> CD45RO <sup>+</sup> CCR7 <sup>+</sup>                                                                                                     |
| Effector memory T cells           | CD4 <sup>+</sup> CD45RO <sup>+</sup> CCR7 <sup>-</sup> /CD8 <sup>+</sup> CD45RO <sup>+</sup> CCR7 <sup>-</sup>                                                                                                     |
| Small intestinal homing T cells   | CD4 <sup>+</sup> α4 <sup>+</sup> β7 <sup>+</sup> CCR9 <sup>+</sup> /CD8 <sup>+</sup> α4 <sup>+</sup> β7 <sup>+</sup> CCR9 <sup>+</sup>                                                                             |
| Antigen-experienced T cells       | CD3 <sup>+</sup> CD4 <sup>+</sup> CD45RO <sup>+</sup>                                                                                                                                                              |
| T helper 1 T cells                | CD3 <sup>+</sup> CD4 <sup>+</sup> CD45RO <sup>+</sup> CCR6 <sup>-</sup> CXCR3 <sup>+</sup>                                                                                                                         |
| T helper 2 T cells                | CD3 <sup>+</sup> CD4 <sup>+</sup> CD45RO <sup>+</sup> CCR6 <sup>+</sup> CCR4 <sup>+</sup>                                                                                                                          |
| T helper 17 T cells               | CD3 <sup>+</sup> CD4 <sup>+</sup> CD45RO <sup>+</sup> CCR6 <sup>+</sup> CCR4 <sup>+</sup>                                                                                                                          |
| T helper 17.1 T cells             | CD3 <sup>+</sup> CD4 <sup>+</sup> CD45RO <sup>+</sup> CCR6 <sup>+</sup> CXCR3 <sup>+</sup>                                                                                                                         |
| Effector Th1 T cells              | CD4 <sup>+</sup> CD45RA <sup>+</sup> CCR7 <sup>-</sup> CCR6 <sup>-</sup> CXCR3 <sup>+</sup>                                                                                                                        |
| Effector Th2 T cells              | CD4 <sup>+</sup> CD45RA <sup>+</sup> CCR7 <sup>-</sup> CCR6 <sup>-</sup> CCR4 <sup>+</sup>                                                                                                                         |
| Effector Th17 T cells             | CD4 <sup>+</sup> CD45RA <sup>+</sup> CCR7 <sup>-</sup> CCR6 <sup>+</sup> CCR4 <sup>+</sup>                                                                                                                         |
| Effector Th17.1 T cells           | CD4 <sup>+</sup> CD45RA <sup>+</sup> CCR7 <sup>-</sup> CCR6 <sup>+</sup> CXCR3 <sup>+</sup>                                                                                                                        |
| Effector gut-homing T cells       | CD4 <sup>+</sup> CD45RA <sup>+</sup> CCR7 <sup>-</sup> α4 <sup>+</sup> β7 <sup>+</sup> CCR9 <sup>+</sup> /CD8 <sup>+</sup> CD45RA <sup>+</sup> CCR7 <sup>-</sup> α4 <sup>+</sup> β7 <sup>+</sup> CCR9 <sup>+</sup> |
| Central memory Th1 T cells        | CD4 <sup>+</sup> CD45RO <sup>+</sup> CCR7 <sup>+</sup> CCR6 <sup>-</sup> CXCR3 <sup>+</sup>                                                                                                                        |
| Central memory Th2 T cells        | CD4 <sup>+</sup> CD45RO <sup>+</sup> CCR7 <sup>+</sup> CCR6 <sup>-</sup> CCR4 <sup>+</sup>                                                                                                                         |
| Central memory Th17 T cells       | CD4 <sup>+</sup> CD45RO <sup>+</sup> CCR7 <sup>+</sup> CCR6 <sup>+</sup> CCR4 <sup>+</sup>                                                                                                                         |
| Central memory Th17.1 T cells     | CD4 <sup>+</sup> CD45RO <sup>+</sup> CCR7 <sup>+</sup> CCR6 <sup>+</sup> CXCR3 <sup>+</sup>                                                                                                                        |
| Central memory gut-homing T cells | CD4 <sup>+</sup> CD45RO <sup>+</sup> CCR7 <sup>+</sup> α4 <sup>+</sup> β7 <sup>+</sup> CCR9 <sup>+</sup> /CD8 <sup>+</sup> CD45RO <sup>+</sup> CCR7 <sup>+</sup> α4 <sup>+</sup> β7 <sup>+</sup> CCR9 <sup>+</sup> |
| Effector memory Th1 T cells       | CD4 <sup>+</sup> CD45RO <sup>+</sup> CCR7 <sup>-</sup> CCR6 <sup>-</sup> CXCR3 <sup>+</sup>                                                                                                                        |
| Effector memory Th2 T cells       | CD4 <sup>+</sup> CD45RO <sup>+</sup> CCR7 <sup>-</sup> CCR6 <sup>-</sup> CCR4 <sup>+</sup>                                                                                                                         |

|                                    |                                                                                                                                                                                        |
|------------------------------------|----------------------------------------------------------------------------------------------------------------------------------------------------------------------------------------|
| Effector memory Th17 T cells       | CD4 <sup>+</sup> CD45RO <sup>+</sup> CCR7 <sup>-</sup> CCR6 <sup>+</sup> CCR4 <sup>+</sup>                                                                                             |
| Effector memory Th17.1 T cells     | CD4 <sup>+</sup> CD45RO <sup>+</sup> CCR7 <sup>-</sup> CCR6 <sup>+</sup> CXCR3 <sup>+</sup>                                                                                            |
| Effector memory gut-homing T cells | CD4 <sup>+</sup> CD45RO <sup>+</sup> CCR7 <sup>-</sup> α4β7 <sup>+</sup> CCR9 <sup>+</sup> /CD8 <sup>+</sup> CD45RO <sup>+</sup> CCR7 <sup>-</sup> α4β7 <sup>+</sup> CCR9 <sup>+</sup> |

Supplementary Table 3: Duodenal T cell populations in FD patients with and without concomitant IBS (%)

|                                | Control<br>(mean±SD) | FD IBS -ve<br>(mean±SD) | FD IBS +ve<br>(mean±SD) | Control vs. FD-IBS<br>(p value) | Control vs. FD+IBS<br>(p value) | FD-IBS vs. FD+IBS<br>(p value) |
|--------------------------------|----------------------|-------------------------|-------------------------|---------------------------------|---------------------------------|--------------------------------|
|                                | n=23                 | n=34                    | n=15                    |                                 |                                 |                                |
| CD3+                           | 39.30±10.69          | 40.56±14.20             | 45.29±15.14             | 0.729                           | 0.183                           | 0.259                          |
| CD4+                           | 32.57±11.12          | 28.41±14.89             | 29.73±11.45             | 0.261                           | 0.543                           | 0.769                          |
| CD8+                           | 25.67±16.05          | 18.81±11.42             | 17.83±9.64              | 0.064                           | 0.096                           | 0.826                          |
| CD4+ effector                  | 2.06±2.17            | 3.68±2.76               | 4.52±3.28               | 0.024*                          | 0.010*                          | 0.437                          |
| CD4+ effector gut-homing       | 5.04±5.46            | 7.39±6.15               | 6.97±4.92               | 0.138                           | 0.202                           | 0.944                          |
| CD4+ effector Th1              | 7.90±13.22           | 1.87±4.15               | 1.28±2.62               | 0.165                           | 0.251                           | 0.994                          |
| CD4+ effector Th2              | 13.03±16.11          | 19.03±16.80             | 21.67±12.42             | 0.098                           | 0.035*                          | 0.417                          |
| CD4+ effector Th17             | 31.74±24.72          | 46.33±24.69             | 43.84±22.19             | 0.029*                          | 0.137                           | 0.741                          |
| CD4+ effector Th17.1           | 14.17±25.75          | 3.78±133.67             | 0.50±0.98               | 0.633                           | 0.365                           | 0.578                          |
| CD4+ naïve                     | 1.18±1.08            | 1.63±1.43               | 2.29±2.51               | 0.201                           | 0.076                           | 0.425                          |
| CD8+ effector                  | 2.15±3.95            | 1.30±4.19               | 0.79±0.61               | 0.026*                          | 0.204                           | 0.523                          |
| CD8+ effector gut-homing       | 3.23±5.79            | 1.70±2.69               | 1.27±2.44               | 0.547                           | 0.422                           | 0.733                          |
| CD8+ naïve                     | 1.11±1.00            | 1.16±0.99               | 1.20±0.67               | 0.689                           | 0.291                           | 0.434                          |
| CD4+ central memory            | 3.35±2.68            | 2.37±1.66               | 2.229±1.55              | 0.083                           | 0.132                           | 0.909                          |
| CD4+ central memory gut-homing | 19.19±10.08          | 17.74±11.14             | 20.72±12.92             | 0.641                           | 0.686                           | 0.398                          |
| CD4+ central memory Th1        | 17.14±19.76          | 8.12±10.13              | 5.76±6.85               | 0.162                           | 0.119                           | 0.659                          |
| CD4+ central memory Th2        | 23.75±18.97          | 37.20±17.73             | 38.23±17.72             | 0.014*                          | 0.038*                          | 0.941                          |
| CD4+ central memory Th17       | 14.54±7.76           | 17.81±9.96              | 14.04±7.40              | 0.182                           | 0.867                           | 0.174                          |

|                                 |             |             |             |         |          |        |
|---------------------------------|-------------|-------------|-------------|---------|----------|--------|
| CD4+ central memory Th17.1      | 11.35±8.98  | 7.86±7.79   | 12.80±15.16 | 0.091   | 0.615    | 0.358  |
| CD4+ effector memory            | 3.49±4.91   | 1.09±1.47   | 1.20±1.35   | 0.134   | 0.384    | 0.724  |
| CD4+ effector memory gut-homing | 9.08±8.24   | 3.97±4.49   | 5.29±4.93   | 0.015*  | 0.248    | 0.378  |
| CD4+ effector memory Th1        | 16.14±15.65 | 10.41±8.96  | 6.58±6.30   | 0.510   | 0.100    | 0.232  |
| CD4+ effector memory Th2        | 9.80±10.50  | 17.85±11.50 | 26.45±17.76 | 0.023*  | 0.000*** | 0.034* |
| CD4+ effector memory Th17       | 11.95±8.41  | 18.52±15.62 | 18.28±16.21 | 0.090   | 0.180    | 0.956  |
| CD4+ effector memory Th17.1     | 10.65±8.38  | 9.06±7.86   | 8.84±6.73   | 0.465   | 0.491    | 0.925  |
| CD8+ central memory             | 2.78±1.59   | 3.10±2.38   | 3.03±2.00   | 0.577   | 0.718    | 0.916  |
| CD8+ central memory gut-homing  | 16.17±16.45 | 5.21±5.99   | 3.16±3.07   | 0.005** | 0.003**  | 0.468  |
| CD8+ effector memory            | 5.70±8.79   | 2.17±4.74   | 0.70±0.68   | 0.449   | 0.282    | 0.618  |
| CD8+ effector memory gut-homing | 2.56±3.77   | 2.41±3.60   | 0.33±0.96   | 0.830   | 0.043*   | 0.046* |

Supplementary Table 4: Peripheral T cell populations in FD patients with and without concomitant IBS (%)

|                                | Control<br>(mean±SD) | FD IBS -ve<br>(mean±SD) | FD IBS +ve<br>(mean±SD) | Control vs. FD-IBS<br>(p value) | Control vs. FD+IBS<br>(p value) | FD-IBS vs. FD+IBS<br>(p value) |
|--------------------------------|----------------------|-------------------------|-------------------------|---------------------------------|---------------------------------|--------------------------------|
|                                | n=37                 | n=33                    | n=28                    |                                 |                                 |                                |
| CD3+                           | 41.13±13.70          | 48.44±26.06             | 47.31±10.87             | 0.101                           | 0.184                           | 0.811                          |
| CD4+                           | 45.63±18.70          | 40.51±17.89             | 47.23±13.26             | 0.220                           | 0.708                           | 0.133                          |
| CD4+ gut-homing                | 0.34±0.45            | 0.97±1.43               | 0.45±0.48               | 0.338                           | 0.423                           | 0.895                          |
| CD8+                           | 23.21±15.15          | 18.25±14.53             | 22.99±14.96             | 0.311                           | 0.880                           | 0.283                          |
| CD8+ gut-homing                | 0.364±0.267          | 0.573±0.60              | 0.55±0.42               | 0.363                           | 0.152                           | 0.621                          |
| CD4+ effector                  | 1.59±2.07            | 1.28±1.73               | 1.62±1.49               | 0.466                           | 0.298                           | 0.091                          |
| CD4+ effector gut-homing       | 2.07±2.37            | 2.57±4.21               | 3.52±3.70               | 0.599                           | 0.059                           | 0.020*                         |
| CD4+ effector Th1              | 24.13±24.16          | 9.71±12.10              | 17.85±14.84             | 0.007**                         | 0.774                           | 0.026*                         |
| CD4+ effector Th2              | 16.20±12.34          | 20.35±16.80             | 14.11±8.57              | 0.401                           | 0.637                           | 0.217                          |
| CD4+ effector Th17             | 4.93±6.59            | 9.14±10.90              | 2.97±2.83               | 0.229                           | 0.688                           | 0.131                          |
| CD4+ effector Th17.1           | 1.29±1.23            | 1.24±1.45               | 0.99±1.15               | 0.561                           | 0.300                           | 0.637                          |
| CD4+ naïve                     | 15.35±12.94          | 17.26±13.90             | 18.00±13.90             | 0.557                           | 0.438                           | 0.834                          |
| CD8+ effector                  | 6.07±6.24            | 2.10±3.25               | 3.28±3.00               | 0.003**                         | 0.400                           | 0.048*                         |
| CD8+ effector gut-homing       | 2.21±1.96            | 1.46±2.17               | 2.74±2.08               | 0.051                           | 0.357                           | 0.007**                        |
| CD8+ naïve                     | 5.06±4.24            | 7.95±7.40               | 7.34±7.80               | 0.161                           | 0.319                           | 0.731                          |
| CD4+ central memory            | 9.40±6.68            | 10.48±9.91              | 13.78±9.68              | 0.613                           | 0.050                           | 0.149                          |
| CD4+ central memory gut-homing | 1.61±1.48            | 1.49±1.71               | 1.85±2.21               | 0.500                           | 0.494                           | 0.194                          |
| CD4+ central memory Th1        | 9.63±6.44            | 15.17±11.12             | 15.80±11.36             | 0.057                           | 0.029*                          | 0.721                          |

|                                 |             |             |             |         |       |         |
|---------------------------------|-------------|-------------|-------------|---------|-------|---------|
| CD4+ central memory Th2         | 11.79±7.12  | 16.35±13.34 | 11.64±7.78  | 0.349   | 0.731 | 0.224   |
| CD4+ central memory Th17        | 31.90±19.01 | 16.70±17.09 | 25.19±20.08 | 0.005** | 0.244 | 0.146   |
| CD4+ central memory Th17.1      | 19.75±15.10 | 7.01±11.80  | 17.92±16.65 | 0.002** | 0.748 | 0.011*  |
| CD4+ effector memory            | 4.13±4.06   | 2.03±2.57   | 4.11±3.65   | 0.043*  | 0.872 | 0.035*  |
| CD4+ effector memory gut-homing | 0.294±0.325 | 0.343±0.56  | 0.50±0.630  | 0.414   | 0.400 | 0.112   |
| CD4+ effector memory Th1        | 27.84±18.22 | 19.25±15.26 | 30.35±14.85 | 0.031*  | 0.541 | 0.009** |
| CD4+ effector memory Th2        | 12.71±10.86 | 8.05±9.85   | 11.23±8.65  | 0.041*  | 0.774 | 0.104   |
| CD4+ effector memory Th17       | 4.70±3.87   | 2.87±3.83   | 5.22±5.01   | 0.062   | 0.807 | 0.047*  |
| CD4+ effector memory Th17.1     | 6.38±5.91   | 9.63±13.05  | 7.62±7.12   | 0.999   | 0.571 | 0.581   |
| CD8+ central memory             | 2.20±2.08   | 2.29±2.31   | 2.46±2.17   | 0.995   | 0.679 | 0.700   |
| CD8+ central memory gut-homing  | 4.11±3.19   | 3.42±3.87   | 4.31±3.48   | 0.216   | 0.942 | 0.218   |
| CD8+ effector memory            | 1.67±1.54   | 0.963±1.23  | 1.99±1.99   | 0.108   | 0.678 | 0.055   |
| CD8+ effector memory gut-homing | 2.22±2.03   | 1.81±2.53   | 2.46±2.50   | 0.174   | 0.876 | 0.153   |

Supplementary Table 5: Duodenal T cell populations in FD patients and controls taking proton pump inhibitors (%)

|                                | Control<br>(mean±SD) | FD PPI -ve<br>(mean±SD) | FD PPI +ve<br>(mean±SD) | Control vs. FD -PPI<br>( <i>p</i> value) | Control vs. FD +PPI<br>( <i>p</i> value) | FD -PPI vs. FD +PPI<br>( <i>p</i> value) |
|--------------------------------|----------------------|-------------------------|-------------------------|------------------------------------------|------------------------------------------|------------------------------------------|
|                                | n=24                 | n=21                    | n=19                    |                                          |                                          |                                          |
| CD3+                           | 38.90±10.64          | 43.16±14.64             | 43.74±13.41             | 0.273                                    | 0.226                                    | 0.888                                    |
| CD4+                           | 32.46±10.88          | 27.84±13.09             | 29.87±16.38             | 0.281                                    | 0.536                                    | 0.657                                    |
| CD8+                           | 25.83±15.72          | 17.01±10.21             | 20.39±12.49             | 0.042*                                   | 0.200                                    | 0.458                                    |
| CD4+ effector                  | 1.99±2.15            | 4.17±3.08               | 4.19±3.12               | 0.011*                                   | 0.013                                    | 0.973                                    |
| CD4+ effector gut-homing       | 5.44±5.67            | 7.32±5.24               | 6.39±6.52               | 0.288                                    | 0.601                                    | 0.615                                    |
| CD4+ effector Th1              | 7.90±13.22           | 0.87±2.15               | 2.54±4.42               | 0.043*                                   | 0.769                                    | 0.098                                    |
| CD4+ effector Th2              | 13.08±15.75          | 24.78±16.68             | 16.58±14.15             | 0.010*                                   | 0.300                                    | 0.159                                    |
| CD4+ effector Th17             | 31.02±24.43          | 44.33±21.84             | 48.98±27.27             | 0.074                                    | 0.020*                                   | 0.551                                    |
| CD4+ effector Th17.1           | 14.18±25.18          | 0.51±1.13               | 0.68±1.54               | 0.140                                    | 0.428                                    | 0.539                                    |
| CD4+ naïve                     | 1.15±1.07            | 1.75±1.31               | 2.68±2.82               | 0.091                                    | 0.29*                                    | 0.589                                    |
| CD8+ effector                  | 2.20±3.93            | 0.63±0.44               | 0.67±0.55               | 0.018*                                   | 0.028*                                   | 0.920                                    |
| CD8+ effector gut-homing       | 3.39±5.72            | 1.82±3.55               | 1.56±2.39               | 0.374                                    | 0.476                                    | 0.876                                    |
| CD8+ naïve                     | 1.10±0.98            | 1.23±0.89               | 1.47±1.30               | 0.479                                    | 0.251                                    | 0.650                                    |
| CD4+ central memory            | 3.31±2.62            | 2.18±1.66               | 3.41±3.80               | 0.182                                    | 0.898                                    | 0.259                                    |
| CD4+ central memory gut-homing | 18.80±10.03          | 21.32±14.35             | 17.90±11.89             | 0.494                                    | 0.811                                    | 0.377                                    |
| CD4+ central memory Th1        | 17.35±19.35          | 4.63±5.31               | 11.29±13.68             | 0.039                                    | 0.464                                    | 0.211                                    |
| CD4+ central memory Th2        | 23.19±18.75          | 39.73±17.62             | 34.96±19.32             | 0.008**                                  | 0.068                                    | 0.465                                    |
| CD4+ central memory Th17       | 14.97±7.86           | 19.94±8.49              | 14.03±9.32              | 0.050                                    | 0.905                                    | 0.047*                                   |



|                                 |             |             |             |         |         |        |
|---------------------------------|-------------|-------------|-------------|---------|---------|--------|
| CD4+ central memory Th17.1      | 11.12±8.84  | 8.52±9.34   | 8.30±7.22   | 0.167   | 0.318   | 0.738  |
| CD4+ effector memory            | 3.39±4.82   | 0.59±0.48   | 1.71±2.05   | 0.011*  | 0.796   | 0.034* |
| CD4+ effector memory gut-homing | 8.90±8.11   | 5.42±5.82   | 3.31±5.54   | 0.074   | 0.005** | 0.300  |
| CD4+ effector memory Th1        | 16.61±15.47 | 8.94±9.35   | 7.75±5.52   | 0.161   | 0.294   | 0.965  |
| CD4+ effector memory Th2        | 9.77±10.27  | 19.90±15.06 | 22.98±14.44 | 0.014*  | 0.001** | 0.395  |
| CD4+ effector memory Th17       | 13.36±10.65 | 23.22±18.25 | 13.73±12.08 | 0.080   | 0.997   | 0.095  |
| CD4+ effector memory Th17.1     | 10.18±8.49  | 9.71±7.68   | 9.32±8.25   | 0.868   | 0.716   | 0.847  |
| CD8+ central memory             | 2.80±1.55   | 2.92±2.58   | 3.42±2.07   | 0.850   | 0.352   | 0.462  |
| CD8+ central memory gut-homing  | 16.02±16.11 | 3.55±3.88   | 4.90±6.32   | 0.001** | 0.007** | 0.697  |
| CD8+ effector memory            | 6.28±9.06   | 0.48±0.57   | 2.39±4.66   | 0.032*  | 0.730   | 0.100  |
| CD8+ effector memory gut-homing | 2.67±3.73   | 0.87±1.65   | 1.76±2.92   | 0.076   | 0.334   | 0.462  |

Supplementary Table 6: Peripheral T cell populations in FD patients and controls taking proton pump inhibitors (%)

|                                | Control<br>(mean±SD) | FD PPI -ve<br>(mean±SD) | FD PPI +ve<br>(mean±SD) | Control vs. FD -PPI<br>(p value) | Control vs. FD +PPI<br>(p value) | FD -PPI vs. FD +PPI<br>(p value) |
|--------------------------------|----------------------|-------------------------|-------------------------|----------------------------------|----------------------------------|----------------------------------|
|                                | n=37                 | n=37                    | n=16                    |                                  |                                  |                                  |
| CD3+                           | 41.13±13.70          | 48.64±18.36             | 49.90±26.42             | 0.194                            | 0.023*                           | 0.205                            |
| CD4+                           | 45.63±18.70          | 46.16±16.19             | 39.24±11.72             | 0.891                            | 0.215                            | 0.181                            |
| CD4+ gut-homing                | 0.28±0.27            | 0.79±1.16               | 0.38±0.57               | 0.072                            | 0.730                            | 0.083                            |
| CD8+                           | 23.21±15.15          | 23.18±14.85             | 19.00±14.82             | 0.789                            | 0.506                            | 0.388                            |
| CD8+ gut-homing                | 0.34±0.27            | 0.57±0.50               | 0.52±0.38               | 0.159                            | 0.260                            | 0.970                            |
| CD4+ effector                  | 1.59±2.07            | 1.47±1.72               | 1.16±1.17               | 0.843                            | 0.603                            | 0.501                            |
| CD4+ effector gut-homing       | 2.07±2.37            | 3.02±3.39               | 3.37±5.25               | 0.181                            | 0.896                            | 0.371                            |
| CD4+ effector Th1              | 24.13±24.16          | 14.11±11.65             | 10.40±14.13             | 0.248                            | 0.026*                           | 0.190                            |
| CD4+ effector Th2              | 16.20±12.34          | 17.93±14.38             | 17.92±13.60             | 0.766                            | 0.553                            | 0.720                            |
| CD4+ effector Th17             | 4.93±6.59            | 3.76±4.45               | 12.42±13.00             | 0.792                            | 0.060                            | 0.037*                           |
| CD4+ effector Th17.1           | 1.29±1.23            | 1.23±1.30               | 1.07±1.39               | 0.743                            | 0.374                            | 0.525                            |
| CD4+ naïve                     | 15.35±12.94          | 19.60±13.46             | 17.61±15.88             | 0.186                            | 0.584                            | 0.628                            |
| CD8+ effector                  | 6.08±6.24            | 3.31±3.76               | 2.54±3.76               | 0.129                            | 0.035*                           | 0.359                            |
| CD8+ effector gut-homing       | 2.21±1.96            | 2.30±2.19               | 1.58±2.59               | 0.972                            | 0.128                            | 0.136                            |
| CD8+ naïve                     | 5.06±4.24            | 9.15±7.95               | 6.40±7.21               | 0.041*                           | 0.745                            | 0.220                            |
| CD4+ central memory            | 9.40±6.68            | 12.16±8.60              | 16.51±14.81             | 0.196                            | 0.123                            | 0.592                            |
| CD4+ central memory gut-homing | 1.61±1.48            | 1.65±2.07               | 1.76±2.04               | 0.939                            | 0.711                            | 0.668                            |
| CD4+ central memory Th1        | 9.63±6.44            | 16.78±11.78             | 11.02±6.36              | 0.001**                          | 0.619                            | 0.041*                           |

|                                 |             |             |             |       |          |         |
|---------------------------------|-------------|-------------|-------------|-------|----------|---------|
| CD4+ central memory Th2         | 11.79±7.12  | 11.42±6.90  | 15.88±15.24 | 0.860 | 0.135    | 0.103   |
| CD4+ central memory Th17        | 31.90±19.01 | 24.67±19.70 | 13.47±16.29 | 0.195 | 0.005**  | 0.073   |
| CD4+ central memory Th17.1      | 19,75±15.10 | 17.96±16.01 | 3.39±8.49   | 0.857 | 0.000*** | 0.001** |
| CD4+ effector memory            | 4.13±4.06   | 3.72±3.52   | 1.66±2.11   | 0.957 | 0.036*   | 0.039*  |
| CD4+ effector memory gut-homing | 0.29±0.32   | 0.49±0.63   | 0.31±0.57   | 0.443 | 0.333    | 0.121   |
| CD4+ effector memory Th1        | 27.84±18.22 | 28.29±14.23 | 15.59±15.31 | 0.906 | 0.013*   | 0.010*  |
| CD4+ effector memory Th2        | 12.71±10.86 | 10.93±8.04  | 9.29±12.82  | 0.457 | 0.266    | 0.596   |
| CD4+ effector memory Th17       | 4.70±3.87   | 5.01±4.74   | 2.12±3.69   | 0.870 | 0.026*   | 0.018*  |
| CD4+ effector memory Th17.1     | 6.38±5.91   | 10.19±11.47 | 8.02±10.69  | 0.280 | 0.759    | 0.249   |
| CD8+ central memory             | 2.20±2.08   | 2.42±2.11   | 2.98±2.60   | 0.693 | 0.303    | 0.469   |
| CD8+ central memory gut-homing  | 4.11±3.19   | 3.73±3.58   | 4.07±3.85   | 0.640 | 0.965    | 0.747   |
| CD8+ effector memory            | 1.67±1.54   | 1.73±1.88   | 0.88±1.05   | 0.901 | 0.193    | 0.225   |
| CD8+ effector memory gut-homing | 2.22±2.03   | 1.95±2.13   | 3.17±3.41   | 0.509 | 0.710    | 0.380   |

Supplementary Table 7: Duodenal T cell populations in FD patients and controls analysed by sex (%)

|                                | Control (Female) (mean±SD) | Control (Male) (mean±SD) | FD (Female) (mean±SD) | FD (Male) (mean±SD) | Control female vs. Control male (p value) | Control female vs. FD female (p value) | Control female vs. FD male (p value) | Control male vs. FD female (p value) | Control male vs. FD male (p value) | FD female vs. FD male (p value) |
|--------------------------------|----------------------------|--------------------------|-----------------------|---------------------|-------------------------------------------|----------------------------------------|--------------------------------------|--------------------------------------|------------------------------------|---------------------------------|
|                                | n=11                       | n=12                     | n=37                  | n=11                |                                           |                                        |                                      |                                      |                                    |                                 |
| CD3+                           | 44.99±9.14                 | 36.24±6.25               | 42.91±15.45           | 39.04±11.73         | 0.120                                     | 0.643                                  | 0.287                                | 0.140                                | 0.616                              | 0.390                           |
| CD4+                           | 30.85±11.15                | 34.13±11.34              | 29.97±13.98           | 25.74±13.54         | 0.548                                     | 0.848                                  | 0.360                                | 0.354                                | 0.127                              | 0.361                           |
| CD8+                           | 22.76±15.63                | 28.34±16.64              | 19.25±12.41           | 16.55±3.99          | 0.572                                     | 0.407                                  | 0.406                                | 0.122                                | 0.158                              | 0.861                           |
| CD4+ effector                  | 2.52±2.46                  | 1.20±0.99                | 4.27±3.57             | 3.73±2.21           | 0.225                                     | 0.152                                  | 0.223                                | 0.002**                              | 0.013*                             | 0.949                           |
| CD4+ effector gut-homing       | 3.93±4.21                  | 5.96±6.34                | 6.80±5.64             | 7.89±5.77           | 0.402                                     | 0.156                                  | 0.111                                | 0.653                                | 0.412                              | 0.573                           |
| CD4+ effector Th1              | 4.31±10.51                 | 7.52±9.67                | 1.69±3.72             | 0.70±1.48           | 0.293                                     | 0.834                                  | 0.731                                | 0.121                                | 0.161                              | 0.825                           |
| CD4+ effector Th2              | 11.66±9.95                 | 14.28±20.62              | 21.53±15.47           | 14.03±15.68         | 0.692                                     | 0.073                                  | 0.726                                | 0.172                                | 0.969                              | 0.171                           |
| CD4+ effector Th17             | 44.07±28.25                | 20.44±14.32              | 45.15±24.39           | 46.21±23.63         | 0.019*                                    | 0.894                                  | 0.832                                | 0.002**                              | 0.011*                             | 0.896                           |
| CD4+ effector Th17.1           | 0.51±0.79                  | 23.27±31.57              | 1.49±3.52             | 0.36±0.33           | 0.185                                     | 0.700                                  | 0.537                                | 0.202                                | 0.497                              | 0.705                           |
| CD4+ naïve                     | 1.57±1.30                  | 0.63±0.35                | 1.92±2.02             | 2.07±2.37           | 0.074                                     | 0.777                                  | 0.742                                | 0.0126*                              | 0.038*                             | 0.900                           |
| CD8+ effector                  | 0.96±0.84                  | 4.89±7.41                | 1.29±4.02             | 0.73±0.38           | 0.143                                     | 0.293                                  | 0.908                                | 0.004**                              | 0.114                              | 0.363                           |
| CD8+ effector gut-homing       | 0.91±2.17                  | 2.46±3.71                | 1.79±3.04             | 1.85±2.72           | 0.120                                     | 0.269                                  | 0.432                                | 0.410                                | 0.431                              | 0.880                           |
| CD8+ naïve                     | 1.49±1.32                  | 0.75±0.36                | 1.49±2.06             | 1.07±0.62           | 0.180                                     | 0.780                                  | 0.820                                | 0.162                                | 0.282                              | 0.992                           |
| CD4+ central memory            | 2.40±2.01                  | 4.14±2.98                | 2.62±2.96             | 2.60±1.50           | 0.172                                     | 0.987                                  | 0.591                                | 0.083                                | 0.402                              | 0.506                           |
| CD4+ central memory gut-homing | 17.07±9.70                 | 20.95±10.47              | 19.96±13.22           | 18.49±12.14         | 0.442                                     | 0.792                                  | 0.987                                | 0.479                                | 0.447                              | 0.811                           |

|                                 |             |             |             |             |         |         |         |          |          |       |
|---------------------------------|-------------|-------------|-------------|-------------|---------|---------|---------|----------|----------|-------|
| CD4+ central memory Th1         | 47.10±7.41  | 25.93±21.89 | 8.15±9.71   | 3.25±1.95   | 0.004** | 0.344   | 0.663   | 0.006**  | 0.014*   | 0.689 |
| CD4+ central memory Th2         | 27.20±20.82 | 20.59±17.39 | 36.92±18.32 | 38.90±16.14 | 0.390   | 0.126   | 0.138   | 0.009**  | 0.019*   | 0.753 |
| CD4+ central memory Th17        | 15.83±8.99  | 11.66±2.79  | 16.56±10.20 | 17.73±3.54  | 0.266   | 0.812   | 0.619   | 0.099    | 0.107    | 0.701 |
| CD4+ central memory Th17.1      | 5.89±5.39   | 17.54±12.00 | 9.16±10.64  | 8.81±7.30   | 0.007** | 0.547   | 0.353   | 0.0047** | 0.067    | 0.579 |
| CD4+ effector memory            | 0.78±1.02   | 4.77±5.14   | 1.08±1.33   | 1.13±0.79   | 0.004** | 0.383   | 0.209   | 0.006**  | 0.117    | 0.486 |
| CD4+ effector memory gut-homing | 10.97±8.86  | 7.36±6.37   | 4.42±5.05   | 3.89±3.06   | 0.157   | 0.003** | 0.008** | 0.150    | 0.174    | 0.799 |
| CD4+ effector memory Th1        | 12.37±14.90 | 19.60±16.15 | 9.88±10.42  | 8.91±2.08   | 0.197   | 0.900   | 0.662   | 0.080    | 0.417    | 0.512 |
| CD4+ effector memory Th2        | 7.15±8.33   | 12.23±11.99 | 20.10±15.98 | 20.80±5.47  | 0.300   | 0.005** | 0.002** | 0.115    | 0.035*   | 0.301 |
| CD4+ effector memory Th17       | 10.84±10.75 | 13.06±5.52  | 18.18±15.46 | 19.11±17.62 | 0.516   | 0.165   | 0.244   | 0.562    | 0.607    | 0.954 |
| CD4+ effector memory Th17.1     | 10.49±9.11  | 10.80±8.04  | 8.87±7.95   | 9.07±6.23   | 0.929   | 0.554   | 0.675   | 0.483    | 0.611    | 0.942 |
| CD8+ central memory             | 2.57±1.77   | 2.95±1.47   | 2.97±2.38   | 3.08±1.57   | 0.666   | 0.587   | 0.573   | 0.978    | 0.883    | 0.880 |
| CD8+ central memory gut-homing  | 12.33±15.93 | 19.69±16.80 | 5.31±5.96   | 2.54±2.04   | 0.068   | 0.337   | 0.091   | 0.001**  | 0.000*** | 0.255 |
| CD8+ effector memory            | 0.98±1.80   | 7.63±8.66   | 2.25±4.96   | 1.29±1.35   | 0.013*  | 0.294   | 0.139   | 0.039*   | 0.319    | 0.430 |
| CD8+ effector memory gut-homing | 0.78±2.08   | 3.32±3.64   | 1.60±2.76   | 2.69±4.50   | 0.036*  | 0.463   | 0.215   | 0.058    | 0.283    | 0.417 |

Supplementary Table 8: Peripheral T cell populations in FD patients and controls analysed by sex (%)

|                          | Control<br>(Female)<br>(mean±SD) | Control<br>(Male)<br>(mean±SD) | FD<br>(Female)<br>(mean±SD) | FD (Male)<br>(mean±SD) | Control<br>female<br>vs.<br>Control<br>male<br>( <i>p</i> value) | Control<br>female<br>vs. FD<br>female<br>( <i>p</i> value) | Control<br>female<br>vs. FD<br>male<br>( <i>p</i> value) | Control<br>male vs.<br>FD<br>female<br>( <i>p</i> value) | Control<br>male vs.<br>FD<br>male<br>( <i>p</i> value) | FD<br>female<br>vs. FD<br>male<br>( <i>p</i> value) |
|--------------------------|----------------------------------|--------------------------------|-----------------------------|------------------------|------------------------------------------------------------------|------------------------------------------------------------|----------------------------------------------------------|----------------------------------------------------------|--------------------------------------------------------|-----------------------------------------------------|
|                          | n=19                             | n=18                           | n=42                        | n=19                   |                                                                  |                                                            |                                                          |                                                          |                                                        |                                                     |
| CD3+                     | 42.83±12.02                      | 39.44±15.36                    | 48.83±20.89                 | 45.90±19.64            | 0.887                                                            | 0.198                                                      | 0.436                                                    | 0.146                                                    | 0.356                                                  | 0.701                                               |
| CD4+                     | 42.87±20.56                      | 48.54±16.60                    | 44.11±16.89                 | 42.76±14.50            | 0.319                                                            | 0.795                                                      | 0.985                                                    | 0.365                                                    | 0.317                                                  | 0.782                                               |
| CD4+ gut-homing          | 0.28±0.33                        | 0.28±0.21                      | 0.70±0.96                   | 0.53±1.05              | 0.645                                                            | 0.144                                                      | 0.793                                                    | 0.372                                                    | 0.844                                                  | 0.260                                               |
| CD8+                     | 17.96±12.36                      | 28.76±16.15                    | 17.35±13.81                 | 28.08±14.71            | 0.033*                                                           | 0.932                                                      | 0.035*                                                   | 0.018*                                                   | 0.970                                                  | 0.020*                                              |
| CD8+ gut-homing          | 0.35±0.30                        | 0.38±0.24                      | 0.61±0.61                   | 0.48±0.37              | 0.598                                                            | 0.151                                                      | 0.352                                                    | 0.411                                                    | 0.662                                                  | 0.797                                               |
| CD4+ effector            | 2.17±2.84                        | 1.04±0.96                      | 1.531±1.53                  | 1.22±1.85              | 0.420                                                            | 0.961                                                      | 0.347                                                    | 0.375                                                    | 0.907                                                  | 0.396                                               |
| CD4+ effector gut-homing | 1.43±1.90                        | 2.33±2.16                      | 3.93±5.89                   | 1.87±2.36              | 0.186                                                            | 0.070                                                      | 0.582                                                    | 0.820                                                    | 0.433                                                  | 0.243                                               |
| CD4+ effector Th1        | 26.44±27.82                      | 18.19±13.97                    | 12.18±11.68                 | 16.23±18.01            | 0.930                                                            | 0.193                                                      | 0.409                                                    | 0.176                                                    | 0.373                                                  | 0.740                                               |
| CD4+ effector Th2        | 12.80±9.32                       | 17.82±12.66                    | 17.96±13.25                 | 15.11±10.86            | 0.254                                                            | 0.190                                                      | 0.753                                                    | 0.975                                                    | 0.409                                                  | 0.347                                               |
| CD4+ effector Th17       | 4.95±7.32                        | 3.71±3.225                     | 5.33±8.11                   | 8.60±10.02             | 0.580                                                            | 0.708                                                      | 0.088                                                    | 0.779                                                    | 0.263                                                  | 0.102                                               |
| CD4+ effector Th17.1     | 0.72±0.783                       | 1.87±1.35                      | 1.02±1.35                   | 1.34±1.44              | 0.009**                                                          | 0.580                                                      | 0.216                                                    | 0.013*                                                   | 0.169                                                  | 0.364                                               |
| CD4+ naïve               | 14.44±13.40                      | 16.32±12.75                    | 19.72±14.92                 | 11.32±6.92             | 0.663                                                            | 0.148                                                      | 0.470                                                    | 0.358                                                    | 0.254                                                  | 0.025*                                              |
| CD8+ effector            | 4.14±4.44                        | 7.19±6.68                      | 2.29±2.82                   | 4.15±4.67              | 0.162                                                            | 0.255                                                      | 0.749                                                    | 0.005**                                                  | 0.280                                                  | 0.129                                               |
| CD8+ effector gut-homing | 2.17±2.18                        | 2.25±1.76                      | 2.37±3.32                   | 2.13±1.90              | 0.720                                                            | 0.704                                                      | 0.907                                                    | 0.429                                                    | 0.808                                                  | 0.606                                               |
| CD8+ naïve               | 4.71±4.68                        | 5.44±3.82                      | 7.40±7.23                   | 8.68±8.27              | 0.393                                                            | 0.167                                                      | 0.095                                                    | 0.716                                                    | 0.427                                                  | 0.568                                               |
| CD4+ central memory      | 9.35±6.96                        | 9.47±6.55                      | 13.18±11.56                 | 11.32±8.91             | 0.960                                                            | 0.390                                                      | 0.470                                                    | 0.375                                                    | 0.451                                                  | 0.992                                               |

|                                 |             |             |             |             |       |         |       |         |       |         |
|---------------------------------|-------------|-------------|-------------|-------------|-------|---------|-------|---------|-------|---------|
| CD4+ central memory gut-homing  | 1.68±1.67   | 1.29±0.83   | 2.14±2.78   | 0.98±0.61   | 0.910 | 0.573   | 0.367 | 0.493   | 0.437 | 0.103   |
| CD4+ central memory Th1         | 9.79±7.43   | 9.46±5.50   | 17.44±11.78 | 9.656±5.52  | 0.914 | 0.004** | 0.964 | 0.003** | 0.964 | 0.003** |
| CD4+ central memory Th2         | 12.88±8.68  | 10.57±4.82  | 15.76±12.08 | 10.70±8.65  | 0.544 | 0.636   | 0.306 | 0.246   | 0.700 | 0.094   |
| CD4+ central memory Th17        | 30.26±19.23 | 33.63±19.17 | 16.46±17.09 | 29.75±19.78 | 0.580 | 0.008** | 0.932 | 0.001** | 0.524 | 0.011*  |
| CD4+ central memory Th17.1      | 17.79±16.48 | 21.82±13.65 | 11.08±15.33 | 16.35±16.61 | 0.415 | 0.195   | 0.864 | 0.026*  | 0.325 | 0.274   |
| CD4+ effector memory            | 3.22±4.18   | 5.05±3.83   | 2.45±2.69   | 4.81±4.65   | 0.102 | 0.760   | 0.218 | 0.025*  | 0.671 | 0.076   |
| CD4+ effector memory gut-homing | 0.25±0.32   | 0.34±0.33   | 0.63±1.39   | 0.28±0.33   | 0.366 | 0.560   | 0.803 | 0.631   | 0.518 | 0.779   |
| CD4+ effector memory Th1        | 28.83±19.00 | 26.80±17.85 | 24.81±15.77 | 23.33±16.75 | 0.717 | 0.394   | 0.321 | 0.679   | 0.536 | 0.753   |
| CD4+ effector memory Th2        | 11.72±10.95 | 13.76±10.98 | 9.31±8.98   | 10.05±10.46 | 0.537 | 0.389   | 0.615 | 0.119   | 0.270 | 0.795   |
| CD4+ effector memory Th17       | 3.90±3.86   | 5.59±3.81   | 3.37±3.37   | 5.35±5.56   | 0.204 | 0.686   | 0.509 | 0.062   | 0.541 | 0.243   |
| CD4+ effector memory Th17.1     | 7.52±6.98   | 5.09±4.27   | 10.05±11.65 | 4.24±3.81   | 0.436 | 0.855   | 0.233 | 0.282   | 0.696 | 0.118   |
| CD8+ central memory             | 1.89±1.84   | 2.07±1.46   | 2.49±2.44   | 2.11±1.72   | 0.607 | 0.512   | 0.581 | 0.970   | 0.982 | 0.991   |
| CD8+ central memory gut-homing  | 4.37±3.82   | 3.85±2.49   | 3.86±3.92   | 3.78±3.25   | 0.662 | 0.610   | 0.612 | 0.995   | 0.949 | 0.935   |
| CD8+ effector memory            | 1.00±0.89   | 2.21±1.73   | 1.06±1.34   | 2.24±2.05   | 0.063 | 0.941   | 0.057 | 0.024*  | 0.993 | 0.019*  |
| CD8+ effector memory gut-homing | 1.83±1.99   | 2.66±2.06   | 2.16±2.70   | 2.02±2.13   | 0.277 | 0.980   | 0.860 | 0.200   | 0.360 | 0.818   |

A

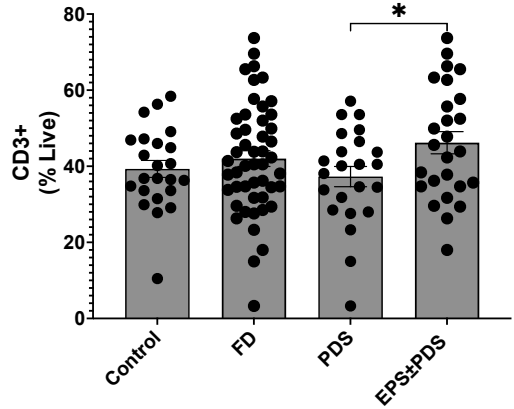

B

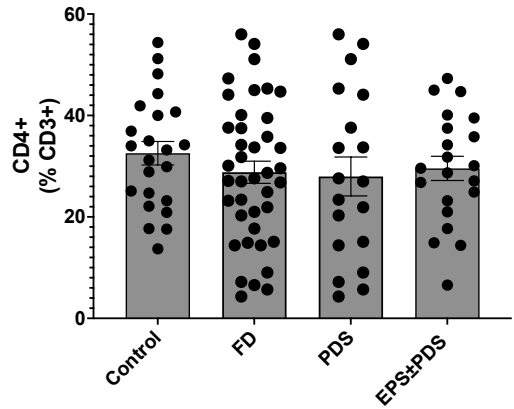

C

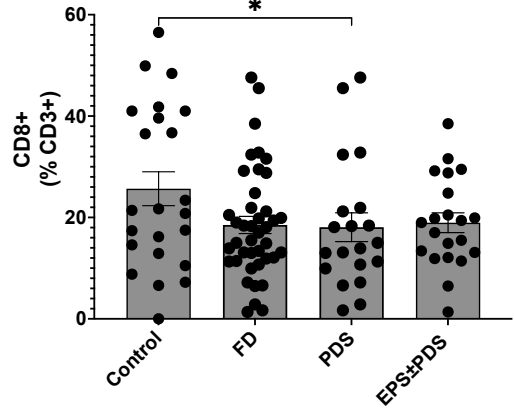

D

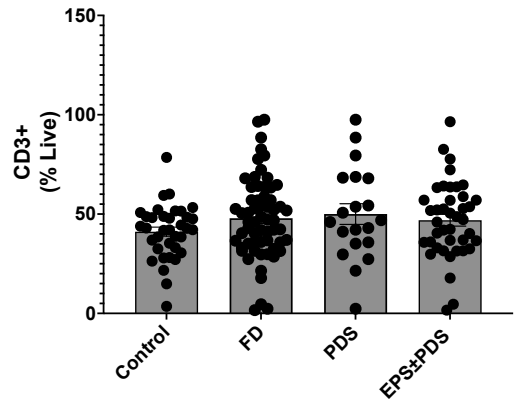

E

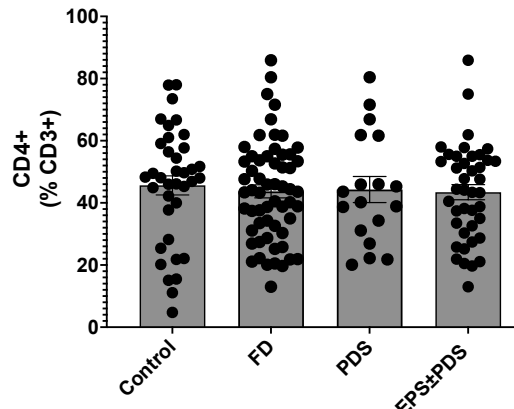

F

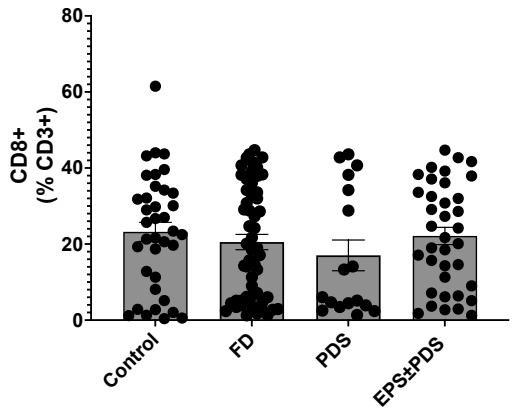



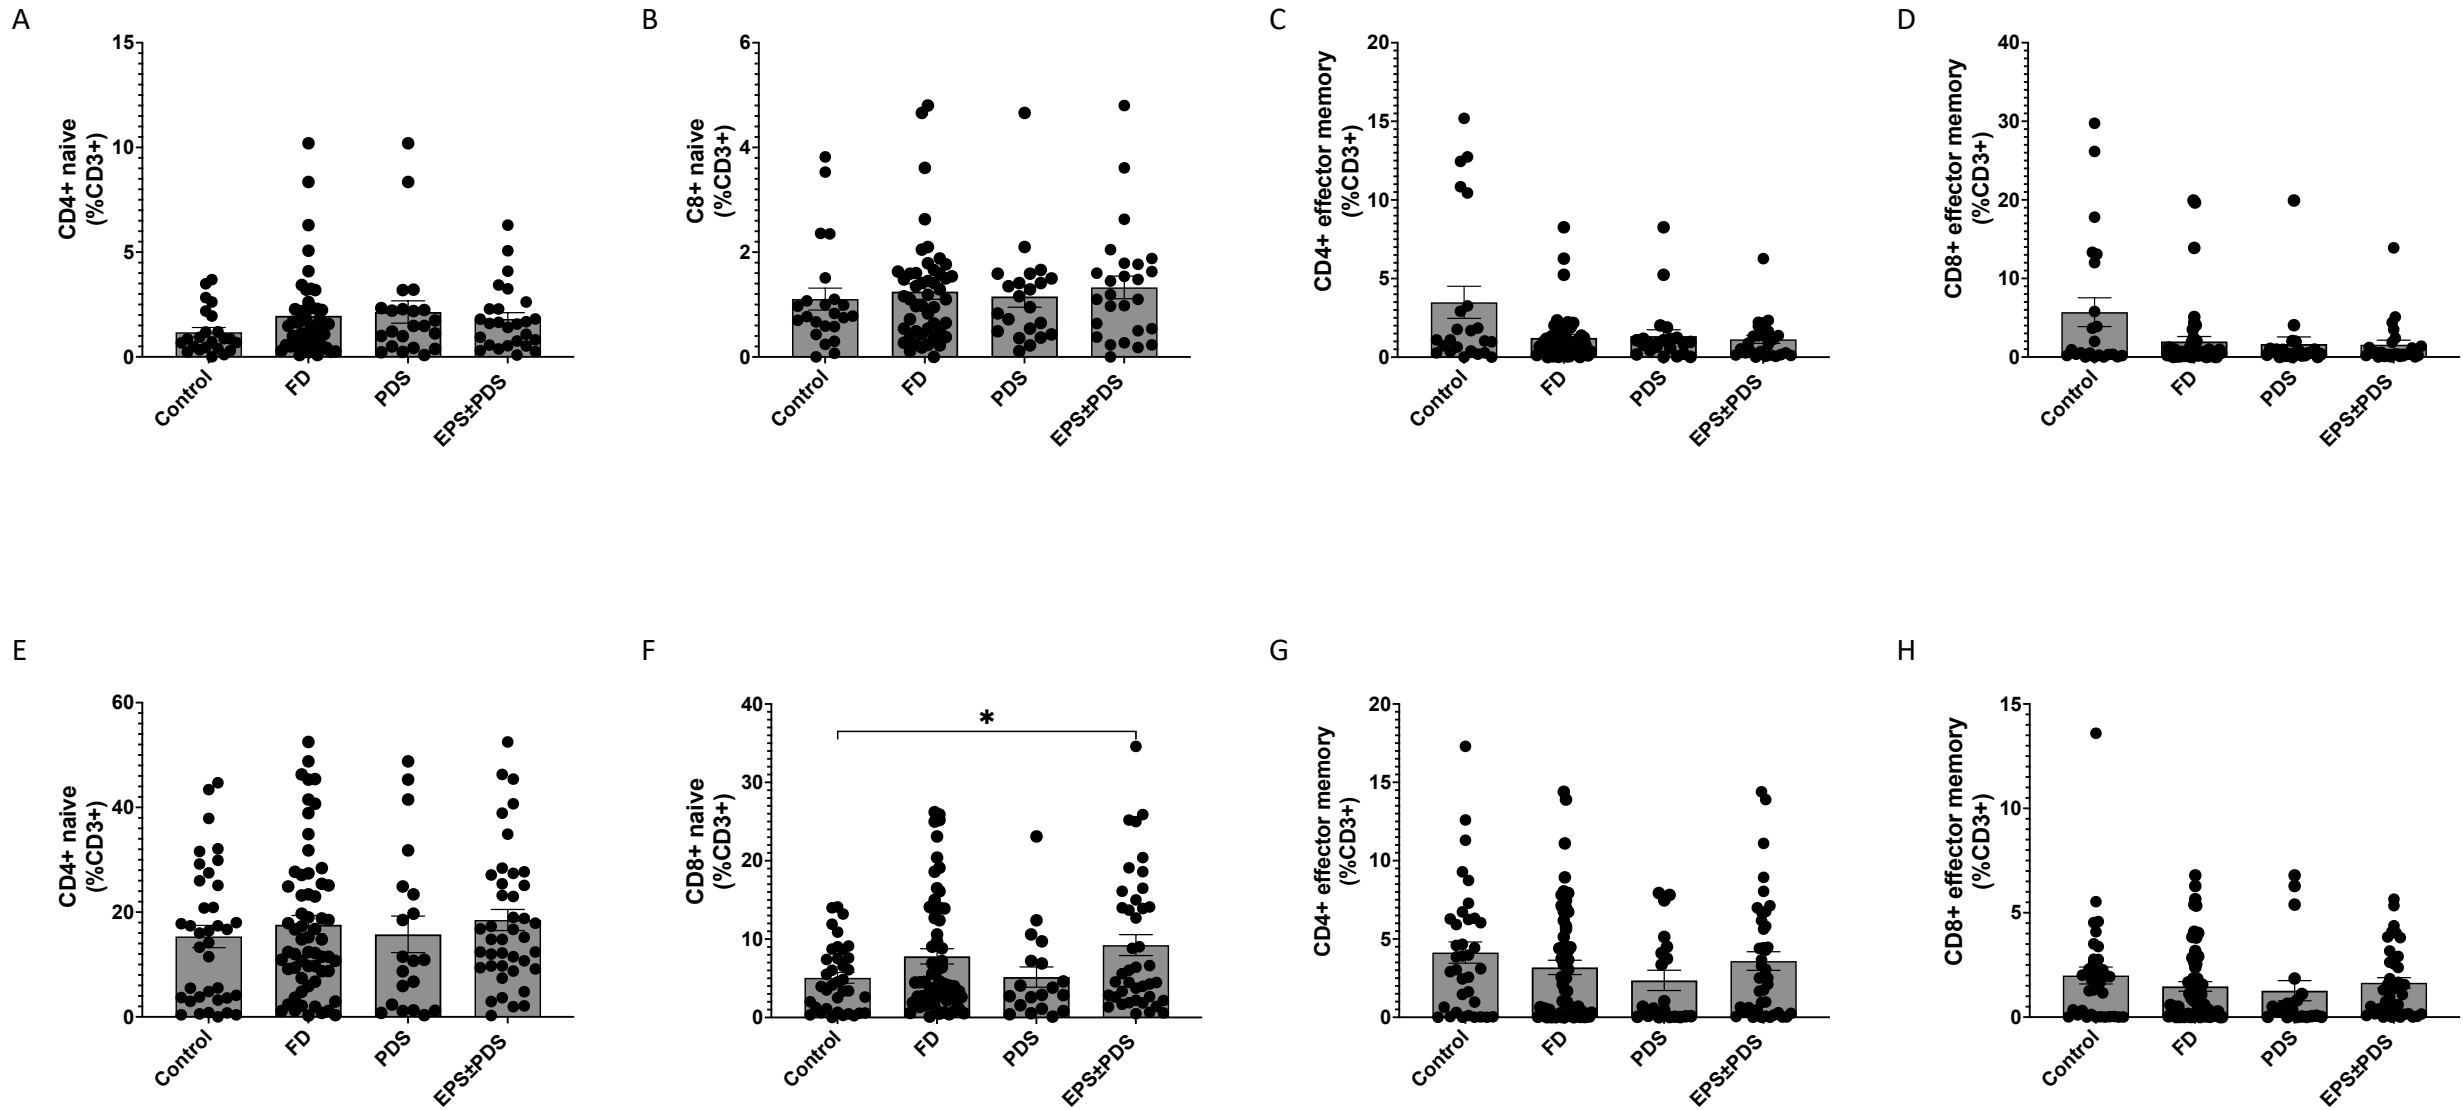

A

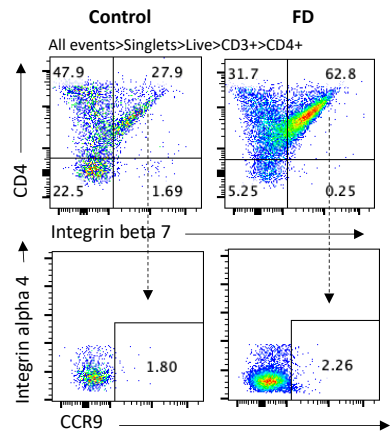

B

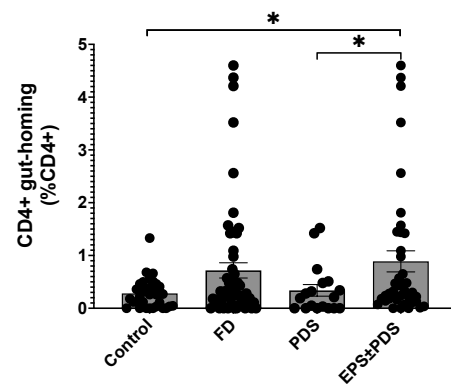

C

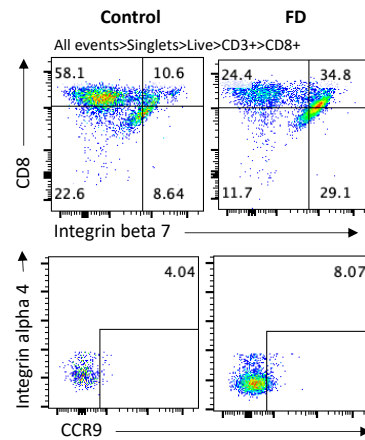

D

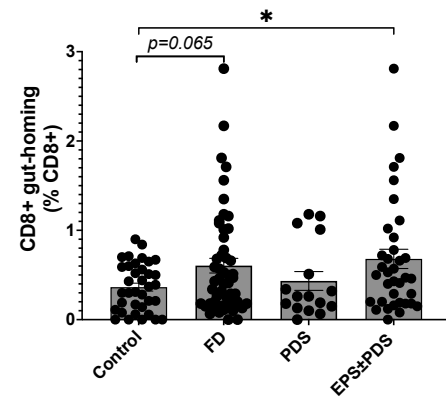

E

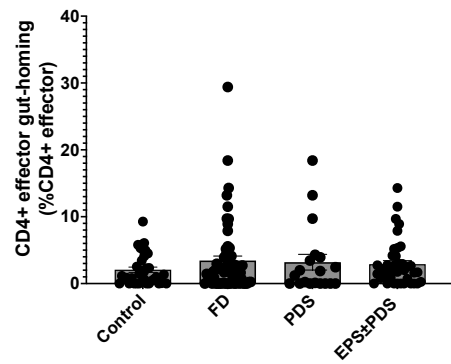

F

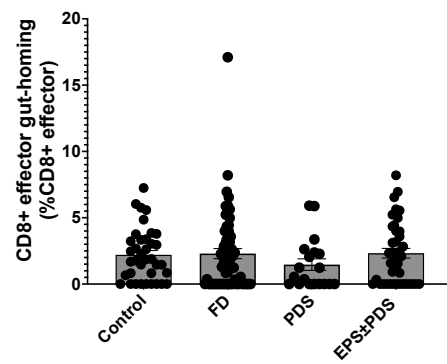

G

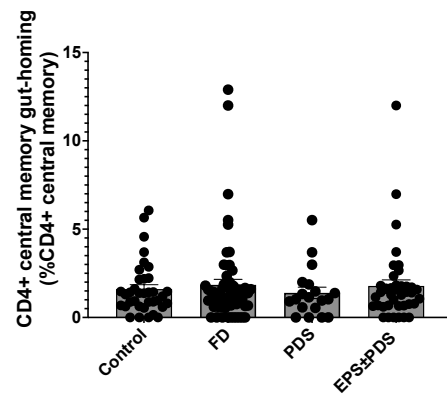

H

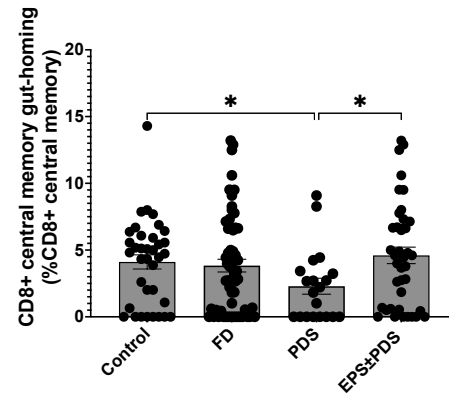

I

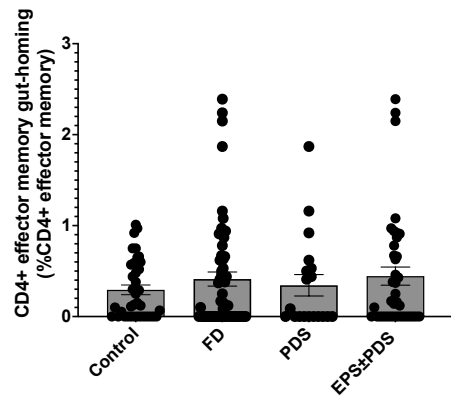

J

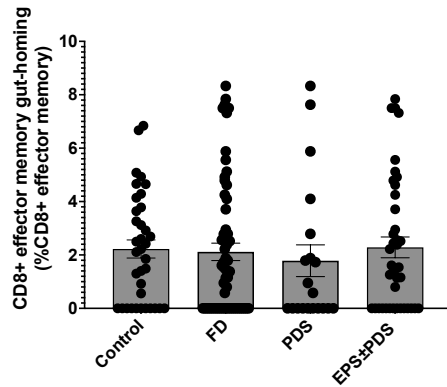

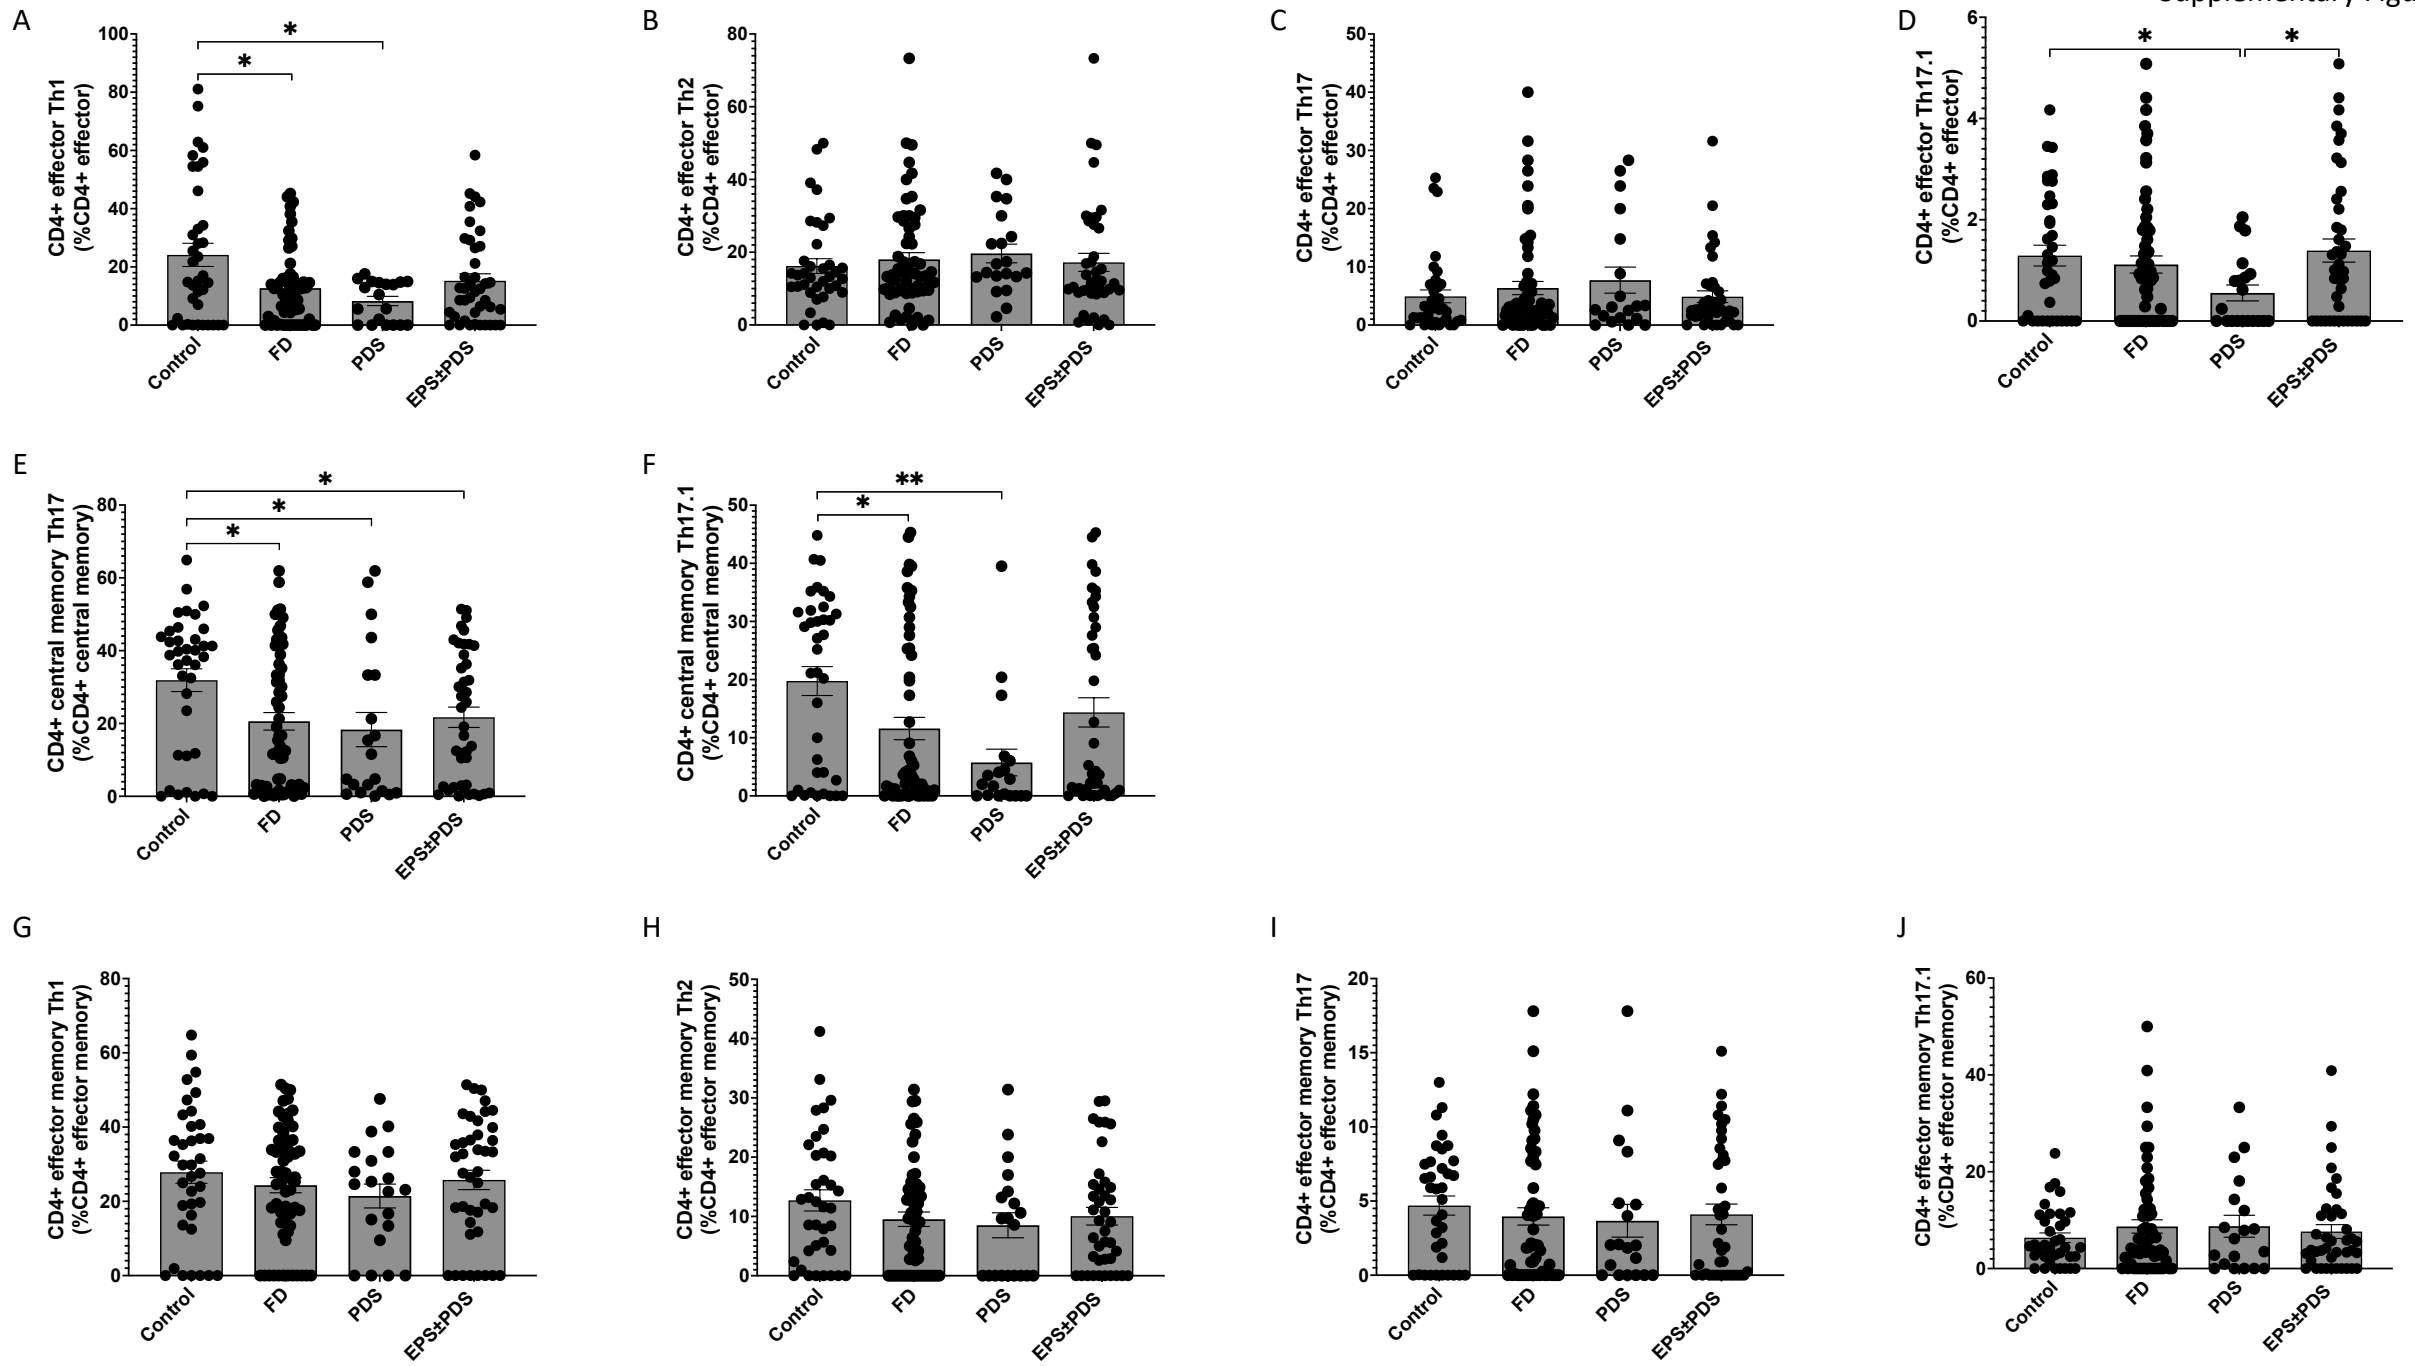

Supplement: Supplementary file [file media-1.pdf]
